# Supplementary material for: Pharmacological effects and mechanism of Kaihoujian Throat Spray (children's type) in the treatment of pediatric acute pharyngitis and tonsillitis
Source: PubMed Central journal article supplement — Heliyon. 2023 Jun 30;9(7):e17802. doi: 10.1016/j.heliyon.2023.e17802 (PMC10395134; doi:10.1016/j.heliyon.2023.e17802), 2023-06-30
Supplement: mmc1.pdf [file mmc1.pdf]

### The detailed information on chemical composition of KHJSC

| ID | chemical composition        | m/z    | RT   | Model | Formula       | Mass Error (ppm) |
|----|-----------------------------|--------|------|-------|---------------|------------------|
| 1  | Oxalic acid                 | 202.98 | 0.48 | pos   | C2H2O4        | 0.12             |
| 2  | Betaine                     | 118.09 | 0.69 | pos   | C5H11NO2      | -0.68            |
| 3  | D-Digitoxose                | 190.11 | 0.73 | pos   | C6H12O4       | -3.37            |
| 4  | Isoguvacine                 | 110.06 | 0.74 | pos   | C6H9NO2       | 0.67             |
| 5  | Cytisine                    | 191.12 | 0.75 | pos   | C11H14N2O     | -2.32            |
| 6  | Aconitic acid               | 175.02 | 1.10 | pos   | C6H6O6        | -2.11            |
| 7  | Swainsonine                 | 174.11 | 1.34 | pos   | C8H15NO3      | -2.08            |
| 8  | Ecgonine Methyl Ester       | 200.13 | 1.47 | pos   | C10H17NO3     | -2.16            |
| 9  | Lupinine                    | 170.15 | 1.64 | pos   | C10H19NO      | -2.48            |
| 10 | Vanillylamine               | 136.08 | 1.80 | pos   | C8H11NO2      | -1.58            |
| 11 | Matrine                     | 249.20 | 1.82 | pos   | C15H24N2O     | -2.62            |
| 12 | Vidarabine                  | 268.10 | 1.99 | pos   | C10H13N5O4    | -1.62            |
| 13 | Sophocarpine                | 493.35 | 2.00 | pos   | C15H22N2O     | -3.00            |
| 14 | Protoanemonin               | 193.05 | 2.03 | pos   | C5H4O2        | -2.29            |
| 15 | P-Coumaric Acid             | 147.04 | 2.03 | pos   | C9H8O3        | -2.02            |
| 16 | Lupanine                    | 497.38 | 2.19 | pos   | C15H24N2O     | -2.55            |
| 17 | Dolichosterone              | 495.37 | 2.24 | pos   | C28H46O5      | 0.33             |
| 18 | Syringic Acid               | 199.06 | 2.24 | pos   | C9H10O5       | -2.48            |
| 19 | Maltol                      | 275.05 | 2.28 | pos   | C6H6O3        | 7.83             |
| 20 | Vincamine                   | 355.20 | 2.62 | pos   | C21H26N2O3    | -3.24            |
| 21 | Licoagroside B              | 433.13 | 2.68 | pos   | C18H24O12     | -2.52            |
| 22 | Phaseolotoxin               | 499.20 | 2.72 | pos   | C14H33N10O7PS | -0.67            |
| 23 | Mangiferin                  | 455.11 | 2.79 | pos   | C19H18O11     | -8.73            |
| 24 | Pisumionoside               | 437.23 | 2.93 | pos   | C19H32O9      | -8.67            |
| 25 | Asperulosidic acid          | 455.11 | 3.16 | pos   | C18H24O12     | -3.14            |
| 26 | Naringin                    | 563.17 | 3.25 | pos   | C27H32O14     | -2.58            |
| 27 | Gentisyl Alcohol            | 141.05 | 3.26 | pos   | C7H8O3        | -2.33            |
| 28 | Puerarin                    | 417.12 | 3.28 | pos   | C21H20O9      | -3.05            |
| 29 | Z-Clausenamide              | 600.29 | 3.40 | pos   | C18H17NO2     | 4.15             |
| 30 | Chrysophanol 1-triglucoside | 741.22 | 3.45 | pos   | C33H40O19     | -2.94            |
| 31 | Ginsenoside Rh4             | 333.21 | 3.47 | pos   | C36H60O8      | 7.51             |
| 32 | Pimpinellin                 | 247.06 | 3.57 | pos   | C13H10O5      | -2.75            |
| 33 | Dehydromonocrotaline        | 387.15 | 3.70 | pos   | C16H21NO6     | 3.95             |
| 34 | Wogonin                     | 285.07 | 3.72 | pos   | C16H12O5      | -2.86            |
| 35 | Trifolirhizin               | 447.13 | 3.73 | pos   | C22H22O10     | -2.77            |
| 36 | Lycoperoside D              | 740.46 | 3.84 | pos   | C39H65NO12    | 5.27             |
| 37 | Isomangiferin               | 455.11 | 3.84 | pos   | C19H18O11     | -8.62            |
| 38 | Isoeriocitrin               | 579.17 | 4.08 | pos   | C27H32O15     | -2.54            |
| 39 | Sakuranetin                 | 328.12 | 4.16 | pos   | C16H14O5      | -3.56            |
| 40 | Notoginsenoside Fe          | 470.27 | 4.16 | pos   | C47H80O17     | 6.75             |
| 41 | Omphalotin C                | 773.96 | 4.55 | pos   | C76H125N13O19 | -0.08            |
| 42 | Narirutin                   | 563.17 | 4.67 | pos   | C27H32O14     | -2.59            |
| 43 | Rutarin                     | 447.13 | 4.73 | pos   | C20H24O10     | 2.87             |
| 44 | Ononin                      | 431.13 | 4.81 | pos   | C22H22O9      | -2.80            |
| 45 | Cimicifugoside              | 692.40 | 4.91 | pos   | C37H54O11     | 5.50             |
| 46 | Glycitin                    | 464.15 | 5.08 | pos   | C22H22O10     | -2.57            |
| 47 | Piperonal                   | 151.04 | 5.10 | pos   | C8H6O3        | -2.09            |
| 48 | P-Anisaldehyde              | 137.06 | 5.27 | pos   | C8H8O2        | -1.85            |
| 49 | Coumarin                    | 147.04 | 5.28 | pos   | C9H6O2        | -2.85            |
| 50 | Cirsimaritin                | 315.09 | 5.34 | pos   | C17H14O6      | -3.33            |
| 51 | Gentisate aldehyde          | 299.05 | 5.52 | pos   | C7H6O3        | 6.02             |

| 52  | Brucein E              | 377.16 | 5.56 | pos   | C20H28O9   | -2.34            |
|-----|------------------------|--------|------|-------|------------|------------------|
| 53  | Madlongiside C         | 650.39 | 5.57 | pos   | C35H56O10  | -7.68            |
| 54  | Glycyrrhetic Acid      | 471.35 | 5.58 | pos   | C30H46O4   | -2.08            |
| 55  | Genistein              | 271.06 | 5.58 | pos   | C15H10O5   | -2.35            |
| 56  | 3,7-Dimethylquercetin  | 313.07 | 5.60 | pos   | C17H14O7   | -2.25            |
| 57  | Lactucin               | 299.09 | 5.62 | pos   | C15H16O5   | 6.02             |
| 58  | Kaempferide            | 283.06 | 5.64 | pos   | C16H12O6   | -2.43            |
| 59  | Nobiletin              | 403.14 | 5.66 | pos   | C21H22O8   | -2.55            |
| 60  | Tangeritin             | 373.13 | 5.71 | pos   | C20H20O7   | -2.69            |
| 61  | Chavicol               | 135.08 | 5.74 | pos   | C9H10O     | -1.55            |
| 62  | Calycosin              | 285.07 | 6.01 | pos   | C16H12O5   | -3.19            |
| 63  | Violet-leaf aldehyde   | 121.10 | 6.14 | pos   | C9H14O     | -0.65            |
| 64  | Daidzein               | 255.06 | 6.32 | pos   | C15H10O4   | -3.21            |
| 65  | Hesperetin             | 285.08 | 7.37 | pos   | C16H14O6   | -2.45            |
| 66  | Torachryson            | 269.08 | 7.38 | pos   | C14H14O4   | 6.73             |
| 67  | Umbelliferone          | 163.04 | 7.97 | pos   | C9H6O3     | -2.46            |
| ID  | chemical composition   | m/z    | RT   | Model | Formula    | Mass Error (ppm) |
| 68  | Neohesperidose         | 371.12 | 0.60 | neg   | C12H22O10  | -1.07            |
| 69  | Hesperidin             | 609.19 | 0.65 | neg   | C28H34O15  | 8.88             |
| 70  | Trans-Aconitic Acid    | 173.01 | 0.73 | neg   | C6H6O6     | -4.39            |
| 71  | Cis-Aconitic anhydride | 155.00 | 0.74 | neg   | C6H4O5     | -5.48            |
| 72  | Gallic Acid            | 169.01 | 1.78 | neg   | C7H6O5     | -4.71            |
| 73  | Gentisic Acid          | 153.02 | 2.36 | neg   | C7H6O4     | -5.55            |
| 74  | Tuliposide B           | 315.07 | 2.45 | neg   | C11H18O9   | 7.23             |
| 75  | Paeonol                | 165.05 | 2.56 | neg   | C9H10O3    | -5.10            |
| 76  | 4-Coumaryl alcohol     | 149.06 | 2.60 | neg   | C9H10O2    | -5.98            |
| 77  | Theogallin             | 343.07 | 2.70 | neg   | C14H16O10  | -1.17            |
| 78  | Coumarinic acid        | 209.05 | 2.74 | neg   | C9H8O3     | -3.26            |
| 79  | Osmundalactone         | 109.03 | 2.77 | neg   | C6H8O3     | -7.89            |
| 80  | Isocoumarin            | 181.01 | 2.94 | neg   | C9H6O2     | -4.46            |
| 81  | Fraxetin               | 207.03 | 3.02 | neg   | C10H8O5    | -2.96            |
| 82  | Bergenin               | 363.05 | 3.02 | neg   | C14H16O9   | -0.75            |
| 83  | Valtrate               | 193.05 | 3.05 | neg   | C10H12O5   | -3.22            |
| 84  | Troxerutin             | 723.21 | 3.16 | neg   | C33H42O19  | -0.80            |
| 85  | Isoferulic acid        | 239.06 | 3.44 | neg   | C10H10O4   | -2.22            |
| 86  | Quercetin 3-sulfate    | 427.00 | 3.48 | neg   | C15H10O10S | -2.37            |
| 87  | Homovanillin           | 165.05 | 3.60 | neg   | C9H10O3    | -4.90            |
| 88  | Cinnamoside            | 517.23 | 3.66 | neg   | C24H38O12  | -0.96            |
| 89  | Noreugenin             | 191.03 | 3.73 | neg   | C10H8O4    | -3.34            |
| 90  | Neoisostilbin          | 449.11 | 3.80 | neg   | C21H22O11  | -1.37            |
| 91  | Cis-Aconitic acid      | 173.01 | 3.81 | neg   | C6H6O6     | -4.28            |
| 92  | Daidzin                | 397.09 | 3.86 | neg   | C21H20O9   | -1.37            |
| 93  | Chrysophanein          | 461.11 | 3.99 | neg   | C21H20O9   | -0.06            |
| 94  | Vanillin               | 151.04 | 4.04 | neg   | C8H8O3     | -5.73            |
| 95  | Quercetin 7-xyloside   | 479.08 | 4.06 | neg   | C20H18O11  | -1.14            |
| 96  | Scopoletin             | 237.04 | 4.10 | neg   | C10H8O4    | -1.61            |
| 97  | Sarmentosin            | 312.05 | 4.13 | neg   | C11H17NO7  | -2.43            |
| 98  | Bengenin               | 327.07 | 4.14 | neg   | C14H16O9   | -1.03            |
| 99  | Uralennoiside          | 285.06 | 4.18 | neg   | C12H14O8   | -1.10            |
| 100 | Isoorientin            | 493.10 | 4.19 | neg   | C21H20O11  | -0.66            |
| 101 | Sinapic Acid           | 223.06 | 4.21 | neg   | C11H12O5   | -2.38            |
| 102 | Acacetin               | 283.06 | 4.22 | neg   | C16H12O5   | -1.09            |
| 103 | Physcion 8-glucoside   | 445.11 | 4.41 | neg   | C22H22O10  | -0.44            |
| 104 | Syringaresinol         | 417.15 | 4.43 | neg   | C22H26O8   | -1.64            |

|     |                            |        |      |     |           |       |
|-----|----------------------------|--------|------|-----|-----------|-------|
| 105 | Quercetin 7-glucoside      | 463.09 | 4.50 | neg | C21H20O12 | -0.34 |
| 106 | Acacetin 7                 | 577.16 | 4.50 | neg | C27H30O14 | -0.72 |
| 107 | Genistein 7-O-Glucoside    | 431.10 | 4.53 | neg | C21H20O10 | -0.91 |
| 108 | Nodakenin                  | 453.14 | 4.54 | neg | C20H24O9  | -0.30 |
| 109 | Phloretin                  | 273.08 | 5.17 | neg | C15H14O5  | -0.68 |
| 110 | Mellein                    | 223.06 | 5.17 | neg | C10H10O3  | -2.99 |
| 111 | Formononetin-7-O-Glucoside | 475.12 | 5.24 | neg | C22H22O9  | -1.49 |
| 112 | Formononetin               | 267.07 | 5.24 | neg | C16H12O4  | -1.09 |
| 113 | Coumafuryl                 | 297.08 | 5.42 | neg | C17H14O5  | -1.77 |
| 114 | Astilbin                   | 449.11 | 5.42 | neg | C21H22O11 | -0.67 |
| 115 | Esculetin                  | 177.02 | 5.43 | neg | C9H6O4    | -4.23 |
| 116 | Wistin                     | 505.14 | 5.45 | neg | C23H24O10 | -0.26 |
| 117 | Phaseolic acid             | 243.12 | 5.46 | neg | C12H22O6  | -1.41 |
| 118 | Prunetinoside              | 491.12 | 5.47 | neg | C22H22O10 | -1.05 |
| 119 | Isoliquiritigenin          | 255.07 | 5.51 | neg | C15H12O4  | -1.14 |
| 120 | Biochanin A                | 283.06 | 5.55 | neg | C16H12O5  | -1.13 |
| 121 | Eugenin                    | 251.06 | 5.56 | neg | C11H10O4  | -1.76 |
| 122 | Alizarin                   | 285.04 | 5.56 | neg | C14H8O4   | -1.13 |
| 123 | Cucurbitic acid            | 257.14 | 5.59 | neg | C12H20O3  | -1.31 |
| 124 | Capsianoside I             | 659.33 | 5.59 | neg | C32H52O14 | -0.52 |
| 125 | Patuletin                  | 313.04 | 5.59 | neg | C16H12O8  | -0.69 |
| 126 | Pinoquercetin              | 297.04 | 5.60 | neg | C16H12O7  | -1.04 |
| 127 | Isostevioside              | 803.37 | 5.64 | neg | C38H60O18 | -0.54 |
| 128 | RUBUSOSIDE                 | 641.32 | 5.65 | neg | C32H50O13 | -0.99 |
| 129 | Quercetin                  | 301.04 | 5.67 | neg | C15H10O7  | -1.01 |
| 130 | Dulcoside A                | 787.38 | 5.67 | neg | C38H60O17 | -0.40 |
| 131 | Pseudobaptigenin           | 281.05 | 5.67 | neg | C16H10O5  | -1.18 |
| 132 | Tectochrysin               | 267.07 | 5.67 | neg | C16H12O4  | -0.93 |
| 133 | REBAUDIOSIDE C             | 949.43 | 5.68 | neg | C44H70O22 | -0.72 |
| 134 | Steviobioside              | 687.32 | 5.71 | neg | C32H50O13 | -0.87 |
| 135 | Neoandrographolide         | 525.27 | 5.74 | neg | C26H40O8  | -2.15 |
| 136 | Geranic acid               | 213.11 | 5.89 | neg | C10H16O2  | -3.40 |
| 137 | Isorhamnetin               | 297.04 | 5.98 | neg | C16H12O7  | -1.35 |
| 138 | Isosakuranetin             | 267.07 | 6.25 | neg | C16H14O5  | -0.98 |
| 139 | Isoimperatorin             | 269.08 | 6.25 | neg | C16H14O4  | -0.96 |
| 140 | Scoparone                  | 251.06 | 6.25 | neg | C11H10O4  | -2.39 |
| 141 | Glycitein                  | 283.06 | 7.15 | neg | C16H12O5  | -0.81 |
| 142 | Marmesin                   | 267.07 | 7.16 | neg | C14H14O4  | 8.60  |
| 143 | Stevioside                 | 803.37 | 7.16 | neg | C38H60O18 | -0.45 |
